# Supplementary material for: Differential Paralog-Specific Expression of Multiple Small Subunit Proteins Cause Variations in Rpl42/eL42 Incorporation in Ribosome in Fission Yeast
Source: MDPI journal article supplement (doi:10.3390/cells11152381), 2022-08-02
Supplement: s1 [file s1]

Supplementary Materials

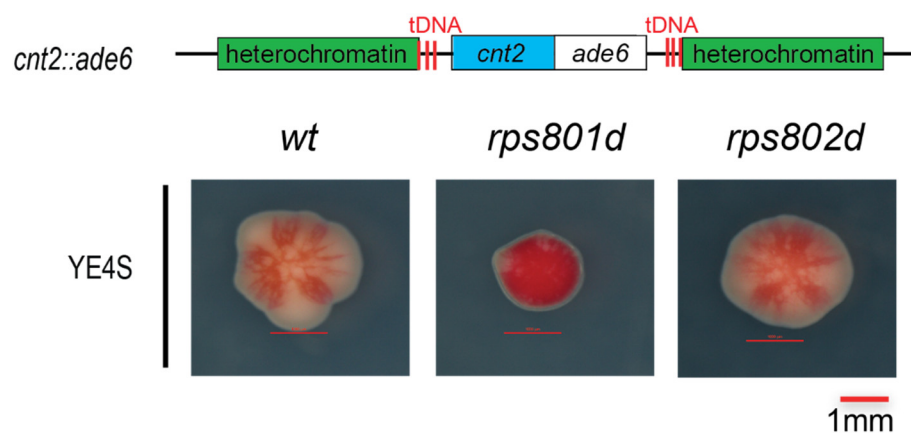

**Figure S1.** *rps8* paralog deletions show differential colony morphology of CEN-PEV. Cells derived from the red colony among wild type, *rps801d* and *rps802d* were planted at the density of one cell/cm<sup>2</sup> by microscopic manipulation on YE+4S plates, incubated at 25°C for eight days. The representative colony for each strain were shown. Scale bar is 1mm.

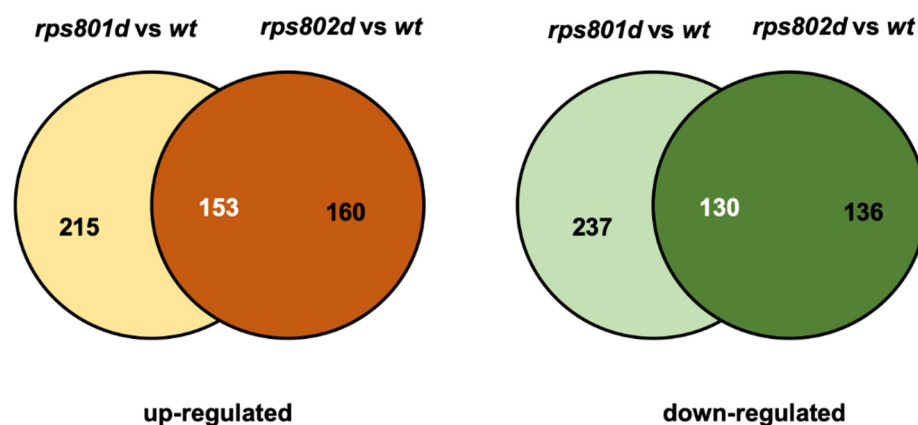

**Figure S2.** Venn diagram showing the overlap between *rps8* paralog deletions vs wild type. Proteins whose abundance was significantly increased are shown in the left; decreased are shown in the right.

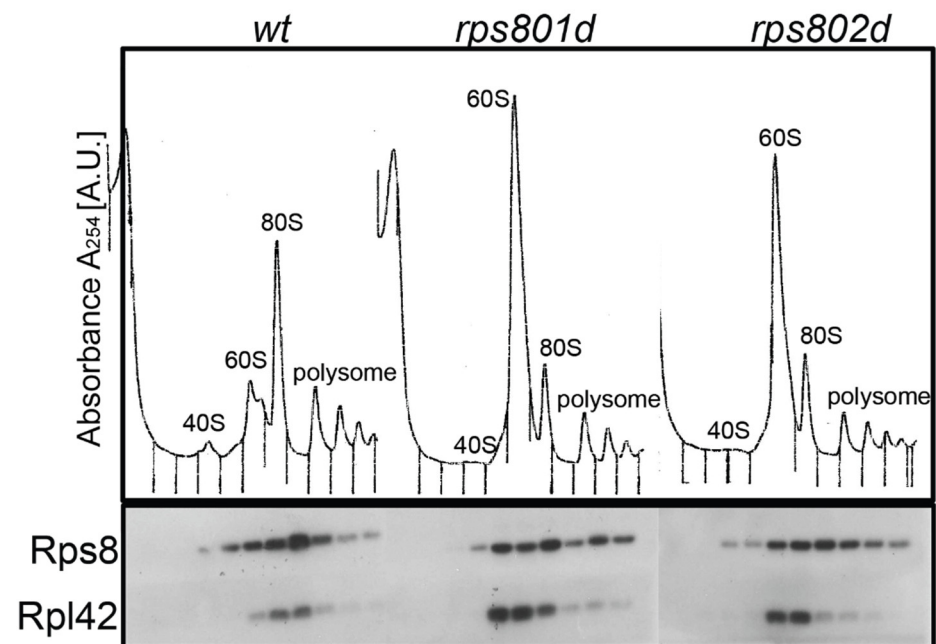

**Figure S3. Rpl42/eL42 protein is present in accumulated 60S subunit in *rps8* paralog deletions.** Polysome analysis by sucrose-gradient-based centrifugation to assess relative abundance of 40S, 60S, 80S ribosomes and polysomes. And Rpl42/eL42 protein level is detected in each fraction among *wt*, *rps801d* and *rps802d* cells by western blotting.

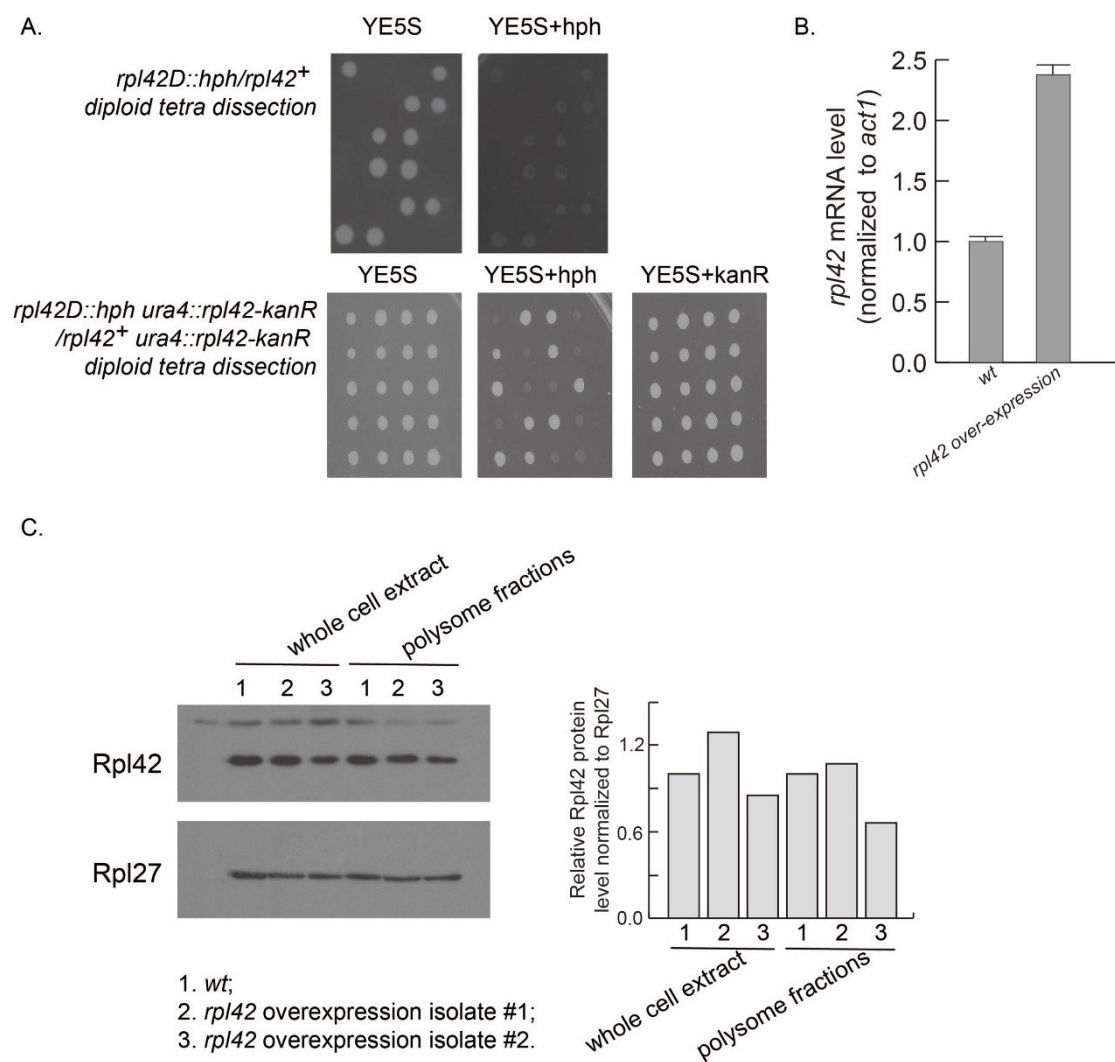

**Figure S4. Quantification of *rpl42* mRNA and protein levels when *rpl42* is overexpressed in haploid wild type cells.** *rpl42* is an essential gene in haploid wild type cells. B. Quantification of *rpl42* mRNA level by qRT-PCR. C. Quantification of Rpl42/eL42 protein level in whole cell extract and polysome fractions.

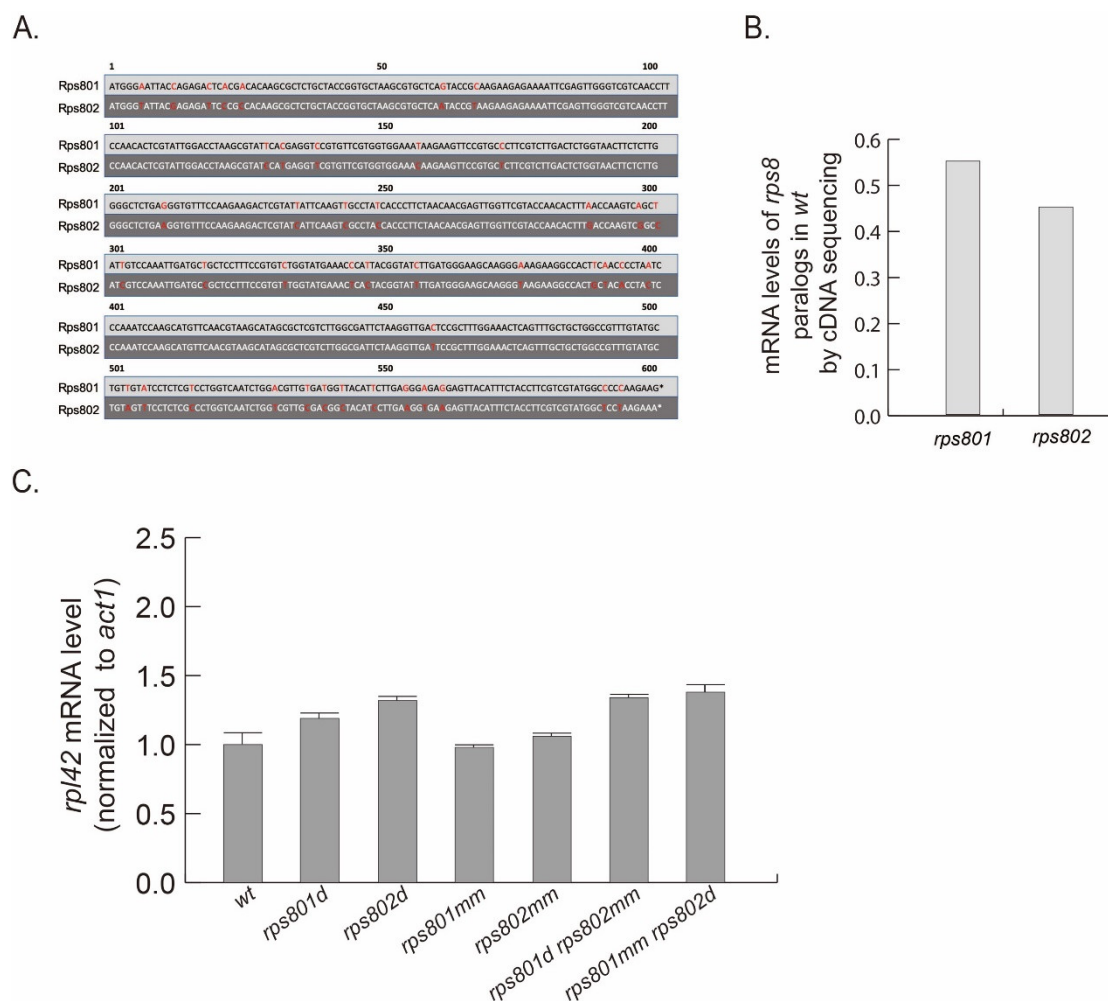

**Figure S5.** Quantification of Rps8/eS8 paralogs mRNA expression level in wild type cells and quantification of *rpl42* mRNA level in wild type and *rps8* mutants. Comparison of Rps8/eS8 paralogs DNA sequence. B. Quantification of *rps8* paralogs mRNA expression level in wild type cells by cDNA sequencing. C. Quantification of *rpl42* mRNA expression level in wild type and *rps8* mutants by qRT-PCR.

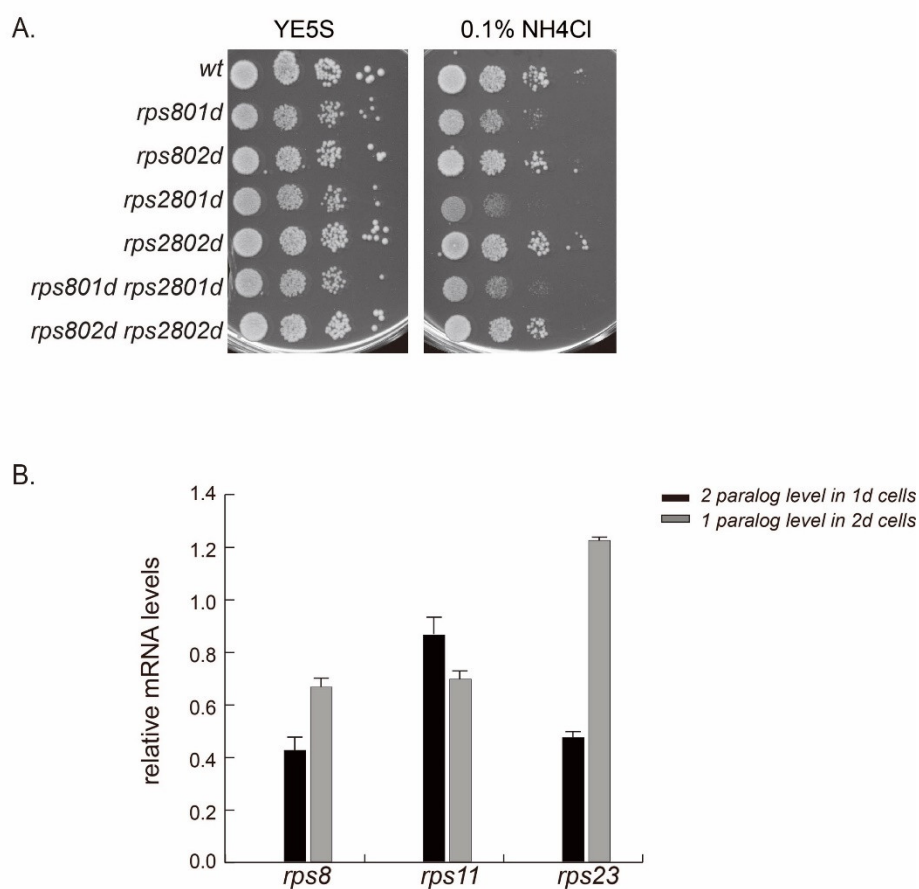

**Figure S6.** Epistasis analysis between *rps8* paralogs and *rps28* paralogs by spotting assay(A) and the impact of deletion one RP paralog gene on the RP total expression level by qRT-PCR (B).

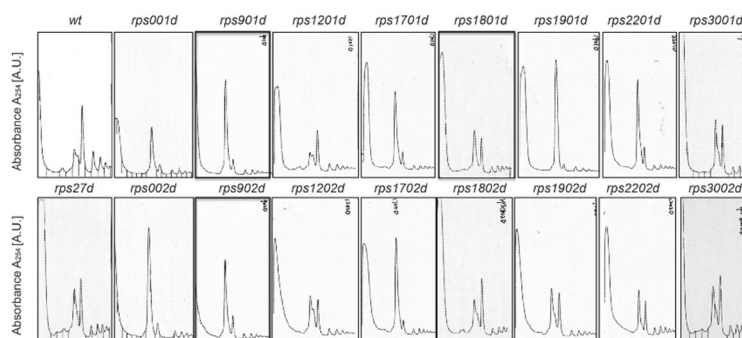

**Figure S7.** 60S subunits accumulation was observed in other *rps* deletion mutants.

**Table S1.** Ribosome paralog deletion mutants show multiple paralog-specific phenotypes.

| Ribosome proteins | Ribosome paralogs | <i>cnt2::ade6</i> PEV | High NH <sub>4</sub> Cl sensitiv-<br>ity | Cycloheximide sensi-<br>tivity |
|-------------------|-------------------|-----------------------|------------------------------------------|--------------------------------|
| Rps0/uS2          | <i>Rps001</i>     | WT-like               | Resistant                                | Sensitive                      |
|                   | <i>Rps002</i>     | Reduced               | Sensitive                                | Sensitive                      |
| Rps1/eS1          | <i>Rps101</i>     | WT-like               | NA                                       | NA                             |

|            |                |           |           |           |
|------------|----------------|-----------|-----------|-----------|
|            | <i>Rps102</i>  | NA        | NA        | NA        |
|            | <i>Rps401</i>  | NA        | NA        | NA        |
| Rps4/eS4   | <i>Rps402</i>  | WT-like   | NA        | NA        |
|            | <i>Rps403</i>  | WT-like   | NA        | NA        |
| Rps5/uS7   | <i>Rps5</i>    | NA        | NA        | NA        |
|            | <i>Rps502</i>  | WT-like   | NA        | NA        |
| Rps6/eS6   | <i>Rps601</i>  | NA        | NA        | NA        |
|            | <i>Rps602</i>  | NA        | NA        | NA        |
| Rps8/eS8   | <i>Rps801</i>  | Reduced   | Sensitive | Sensitive |
|            | <i>Rps802</i>  | WT-like   | Resistant | WT-like   |
| Rps9/uS4   | <i>Rps901</i>  | Reduced   | Resistant | Sensitive |
|            | <i>Rps902</i>  | Reduced   | Resistant | WT-like   |
| Rps10/eS10 | <i>Rps1001</i> | NA        | NA        | NA        |
|            | <i>Rps1002</i> | NA        | NA        | NA        |
| Rps11/uS17 | <i>Rps1101</i> | Reduced   | Resistant | WT-like   |
|            | <i>Rps1102</i> | WT-like   | Sensitive | Sensitive |
| Rps12/eS12 | <i>Rps1201</i> | WT-like   | Resistant | WT-like   |
|            | <i>Rps1202</i> | WT-like   | Resistant | WT-like   |
| Rps14/uS11 | <i>Rps1401</i> | NA        | NA        | NA        |
|            | <i>Rps1402</i> | WT-like   | NA        | NA        |
| Rps15/uS19 | <i>Rps1501</i> | NA        | NA        | NA        |
|            | <i>Rps1502</i> | Reduced   | NA        | NA        |
| Rps17/eS17 | <i>Rps1701</i> | Reduced   | Resistant | Sensitive |
|            | <i>Rps1702</i> | Reduced   | Resistant | Sensitive |
| Rps18/uS13 | <i>Rps1801</i> | WT-like   | Resistant | NA        |
|            | <i>Rps1802</i> | WT-like   | Resistant | NA        |
| Rps19/eS19 | <i>Rps1901</i> | NA        | NA        | NA        |
|            | <i>Rps1902</i> | WT-like   | WT-like   | NA        |
| Rps22/uS8  | <i>Rps2201</i> | WT-like   | Resistant | Sensitive |
|            | <i>Rps2202</i> | Reduced   | Resistant | WT-like   |
| Rps23/uS12 | <i>Rps23</i>   | Reduced   | Sensitive | Sensitive |
|            | <i>Rps2302</i> | WT-like   | Resistant | WT-like   |
| Rps24/eS24 | <i>Rps2401</i> | WT-like   | NA        | NA        |
|            | <i>Rps2402</i> | NA        | NA        | NA        |
| Rps25/eS25 | <i>Rps2501</i> | NA        | NA        | NA        |
|            | <i>Rps2502</i> | NA        | NA        | NA        |
| Rps26/eS26 | <i>Rps2601</i> | NA        | NA        | NA        |
|            | <i>Rps2602</i> | NA        | NA        | NA        |
| Rps28/eS28 | <i>Rps2801</i> | Reduced   | Sensitive | Sensitive |
|            | <i>Rps2802</i> | Bi-stable | Resistant | WT-like   |
| Rps30/eS30 | <i>Rps3001</i> | Reduced   | WT-like   | WT-like   |
|            | <i>Rps3002</i> | Reduced   | WT-like   | WT-like   |
| Rpl5/uL18  | <i>Rpl501</i>  | WT-like   | Resistant | Sensitive |
|            | <i>Rpl502</i>  | WT-like   | WT-like   | WT-like   |
| Rpl8/eL8   | <i>Rpl801</i>  | NA        | NA        | NA        |
|            | <i>Rpl802</i>  | NA        | NA        | NA        |
|            | <i>Rpl803</i>  | Enhanced  | NA        | NA        |
| Rpl9/uL6   | <i>Rpl901</i>  | Reduced   | Resistant | NA        |
|            | <i>Rpl902</i>  | Reduced   | WT-like   | NA        |
| Rpl10/uL16 | <i>Rpl1001</i> | NA        | NA        | NA        |

|            |                |           |           |           |
|------------|----------------|-----------|-----------|-----------|
|            | <i>Rpl1002</i> | WT-like   | NA        | NA        |
| Rpl11/uL5  | <i>Rpl1101</i> | All white | Sensitive | NA        |
|            | <i>Rpl1102</i> | WT-like   | Sensitive | NA        |
| Rpl12/uL11 | <i>Rpl1201</i> | WT-like   | WT-like   | Sensitive |
|            | <i>Rpl1202</i> | WT-like   | WT-like   | Sensitive |
| Rpl15/eL15 | <i>Rpl15</i>   | NA        | Resistant | NA        |
|            | <i>Rpl1502</i> | WT-like   | Resistant | NA        |
|            | <i>Rpl1601</i> | NA        | NA        | NA        |
| Rpl16/uL13 | <i>Rpl1602</i> | NA        | NA        | NA        |
|            | <i>Rpl1603</i> | WT-like   | NA        | NA        |
|            | <i>Rpl1701</i> | NA        | WT-like   | NA        |
| Rpl17/uL22 | <i>Rpl1702</i> | WT-like   | Resistant | NA        |
|            | <i>Rpl1801</i> | NA        | NA        | NA        |
| Rpl18/eL18 | <i>Rpl1802</i> | NA        | NA        | NA        |
|            | <i>Rpl1901</i> | WT-like   | WT-like   | NA        |
| Rpl19/eL19 | <i>Rpl1902</i> | WT-like   | Resistant | NA        |
|            | <i>Rpl2001</i> | WT-like   | Sensitive | NA        |
| Rpl20/eL20 | <i>Rpl2002</i> | All white | Resistant | NA        |
|            | <i>Rpl2101</i> | All white | WT-like   | NA        |
| Rpl21/eL21 | <i>Rpl2102</i> | NA        | WT-like   | NA        |
|            | <i>Rpl24</i>   | WT-like   | WT-like   | WT-like   |
| Rpl24/eL24 | <i>Rpl2402</i> | WT-like   | WT-like   | WT-like   |
| Rpl27/eL27 | <i>Rpl2701</i> | NA        | NA        | NA        |
|            | <i>Rpl2702</i> | Reduced   | NA        | NA        |
|            | <i>Rpl2801</i> | Enhanced  | WT-like   | WT-like   |
| Rpl28/uL15 | <i>Rpl2802</i> | Reduced   | Resistant | Sensitive |
|            | <i>Rpl3001</i> | NA        | NA        | NA        |
| Rpl30/eL30 | <i>Rpl3002</i> | WT-like   | NA        | NA        |
|            | <i>Rpl3201</i> | NA        | Resistant | NA        |
| Rpl32/eL32 | <i>Rpl3202</i> | NA        | WT-like   | NA        |
| Rpl36/eL36 | <i>Rpl3601</i> | Reduced   | Resistant | Sensitive |
|            | <i>Rpl3602</i> | Reduced   | Resistant | Sensitive |
| Rpl37/eL37 | <i>Rpl3702</i> | WT-like   | NA        | NA        |
|            | <i>Rpl3703</i> | NA        | NA        | NA        |
| Rpl38/eL38 | <i>Rpl3801</i> | WT-like   | Resistant | NA        |
|            | <i>Rpl3802</i> | NA        | WT-like   | NA        |
| Rpl41/eL41 | <i>Rpl4101</i> | NA        | NA        | NA        |
|            | <i>Rpl4102</i> | NA        | NA        | NA        |
| Rpl43/eL43 | <i>Rpl4301</i> | Reduced   | Resistant | Sensitive |
|            | <i>Rpl4302</i> | Enhanced  | WT-like   | WT-like   |

Note: CEN-PEV phenotypes of the RP paralog deletions were examined by visual inspection of the colony color sectoring morphology. NA: not available; Reduced: colonies showed significant reduction in frequency of color switching; Enhanced: colonies showed significant enhancement in frequency of color switching; Bi-stable: the colonies showed both reduced and enhanced PEV phenotype. The growth rates of the RP paralog deletions on YE media supplied with excess NH<sub>4</sub>Cl or different concentrations of cycloheximide were assessed with spotting assay analysis. Resistant: the mutant cells grow better than wild type cells; Sensitive: the wild type cells grow better than the mutants.

**Table S2.** Summary of specific information in different Rps8/eS8 constructs.

| Genotype  | Gene dosage of Rps8 | Protein identity of Rps8 | Promoter of Rps8 |
|-----------|---------------------|--------------------------|------------------|
| <i>wt</i> | 2                   | Rps801 and Rps802        | P1 and P2        |

|                               |   |        |           |
|-------------------------------|---|--------|-----------|
| <i>rps801d</i>                | 1 | Rps802 | P2        |
| <i>rps802d</i>                | 1 | Rps801 | P1        |
| <i>rps801mm</i> (S130A N133T) | 2 | Rps802 | P1 and P2 |
| <i>rps802mm</i> (A130S T133N) | 2 | Rps801 | P1 and P2 |
| <i>rps801mm</i> (S130A N133T) | 1 | Rps802 | P1        |
| <i>rps802mm</i> (A130S T133N) | 1 | Rps801 | P2        |

Table S3. Strain list.

| Name      | Genotype                                                            | Source     |
|-----------|---------------------------------------------------------------------|------------|
| 446       | <i>h- ade6-210 leu1-32 ura4-D18</i>                                 | Lab stock  |
| 447       | <i>h+ ade6-216 leu1-32 ura4-D18</i>                                 | Lab stock  |
| LW258     | <i>rps802d::kanR</i>                                                | This study |
| LW261     | <i>rps802d::hph</i>                                                 | This study |
| LW262     | <i>rps801d ::kanR</i>                                               | This study |
| LW284     | <i>rps801d ::hph</i>                                                | This study |
| LW314     | <i>rps802d ::hph rpl31-GFP ::kanR</i>                               | This study |
| LW316     | <i>rps801d ::hph rpl31-GFP ::kanR</i>                               | This study |
| LW318     | <i>h- rpl31-GFP ::kanR</i>                                          | This study |
| LW539     | <i>rpl42+/- ::hph ura4-rpl42 ::kanR diploid #1</i>                  | This study |
| LW540     | <i>rpl42+/- ::hph ura4-rpl42 ::kanR diploid #2</i>                  | This study |
| LW553     | <i>rpl42+/- ::hph diploid</i>                                       | This study |
| LW515     | <i>rps801mm(S130A N133T)::hph</i>                                   | This study |
| LW454     | <i>rps802mm(A130S T133N)::hph</i>                                   | This study |
| LW471     | <i>rps802mm(A130S T133N)::hph rps801d::kanR</i>                     | This study |
| LW537     | <i>rps801mm(S130A N133T)::hph rps802d::kanR</i>                     | This study |
| LW701     | <i>rps801d ::kanR rpl3201-GFP ::kanR</i>                            | This study |
| LW703     | <i>rps802d ::kanR rpl3201-GFP ::kanR</i>                            | This study |
| ZJ-L3201G | <i>rpl3201-GFP ::kanR</i>                                           | This study |
| ZJ-25-8   | <i>rpl42(G51S F58S) ::kanR</i>                                      | This study |
| ZJ-25-12  | <i>rps801d ::hph rpl42(G51S F58S) ::kanR</i>                        | This study |
| ZJ-25-6   | <i>rps802d ::hph rpl42(G51S F58S) ::kanR</i>                        | This study |
| ZJ-25-7   | <i>rpl42(K100M A103T) ::kanR</i>                                    | This study |
| ZJ-25-15  | <i>rps801d ::hph rpl42(K100M A103T) ::kanR</i>                      | This study |
| ZJ-25-4   | <i>rps802d ::hph rpl42(K100M A103T) ::kanR</i>                      | This study |
| ZJ-DM-5   | <i>rps801d ::hph rps2801d ::kanR</i>                                | This study |
| ZJ-DM-2   | <i>rps802d ::hph rps2802d ::kanR</i>                                | This study |
| LW688     | <i>rps1101d ::kanR rpl42(K100M A103T) ::kanR</i>                    | This study |
| LW689     | <i>rps23d ::kanR rpl42(K100M A103T) ::kanR</i>                      | This study |
| LW691     | <i>rps2302d ::kanR rpl42(K100M A103T) ::kanR</i>                    | This study |
| LW693     | <i>rps1102d ::kanR rpl42(K100M A103T) ::kanR</i>                    | This study |
| LW695     | <i>rps2801d ::kanR rpl42(K100M A103T) ::kanR</i>                    | This study |
| LW697     | <i>rps2802d ::kanR rpl42(K100M A103T) ::kanR</i>                    | This study |
| B08-C06   | <i>rps001d ::kanR cnt2 -ade6 ::nat leu1-32 ura4-D18 ade6D ::hph</i> | Lab stock  |
| B27-A11   | <i>rps002d ::kanR cnt2 -ade6 ::nat leu1-32 ura4-D18 ade6D ::hph</i> | Lab stock  |
| B22-A03   | <i>rps101d ::kanR cnt2 -ade6 ::nat leu1-32 ura4-D18 ade6D ::hph</i> | Lab stock  |
| B03-H10   | <i>rps402d ::kanR cnt2 -ade6 ::nat leu1-32 ura4-D18 ade6D ::hph</i> | Lab stock  |
| B34-G02   | <i>rps403d ::kanR cnt2 -ade6 ::nat leu1-32 ura4-D18 ade6D ::hph</i> | Lab stock  |
| B06-G02   | <i>rps502d ::kanR cnt2 -ade6 ::nat leu1-32 ura4-D18 ade6D ::hph</i> | Lab stock  |
| B30-F11   | <i>rps801d ::kanR cnt2 -ade6 ::nat leu1-32 ura4-D18 ade6D ::hph</i> | Lab stock  |



|           |                                                                      |            |
|-----------|----------------------------------------------------------------------|------------|
| B25-A06   | <i>rps802d ::kanR cnt2 -ade6 ::nat leu1-32 ura4-D18 ade6D ::hph</i>  | Lab stock  |
| B36-G11   | <i>rps901d ::kanR cnt2 -ade6 ::nat leu1-32 ura4-D18 ade6D ::hph</i>  | Lab stock  |
| B29-H01   | <i>rps902d ::kanR cnt2 -ade6 ::nat leu1-32 ura4-D18 ade6D ::hph</i>  | Lab stock  |
| B27-C12   | <i>rps1101d ::kanR cnt2 -ade6 ::nat leu1-32 ura4-D18 ade6D ::hph</i> | Lab stock  |
| B23-A04   | <i>rps1102d ::kanR cnt2 -ade6 ::nat leu1-32 ura4-D18 ade6D ::hph</i> | Lab stock  |
| B09-B08   | <i>rps1201d ::kanR cnt2 -ade6 ::nat leu1-32 ura4-D18 ade6D ::hph</i> | Lab stock  |
| B26-E10   | <i>rps1202d ::kanR cnt2 -ade6 ::nat leu1-32 ura4-D18 ade6D ::hph</i> | Lab stock  |
| B07-B07   | <i>rps1402d ::kanR cnt2 -ade6 ::nat leu1-32 ura4-D18 ade6D ::hph</i> | Lab stock  |
| B31-B08   | <i>rps1502d ::kanR cnt2 -ade6 ::nat leu1-32 ura4-D18 ade6D ::hph</i> | Lab stock  |
| B24-G04   | <i>rps1701d ::kanR cnt2 -ade6 ::nat leu1-32 ura4-D18 ade6D ::hph</i> | Lab stock  |
| B04-G03   | <i>rps1702d ::kanR cnt2 -ade6 ::nat leu1-32 ura4-D18 ade6D ::hph</i> | Lab stock  |
| B24-D02   | <i>rps1801d ::kanR cnt2 -ade6 ::nat leu1-32 ura4-D18 ade6D ::hph</i> | Lab stock  |
| J01-G12   | <i>rps1802d ::kanR cnt2 -ade6 ::nat leu1-32 ura4-D18 ade6D ::hph</i> | Lab stock  |
| LW-S1901D | <i>rps1901d ::kanR leu1-32 ura4-D18 ade6 ?</i>                       | This study |
| B33-E07   | <i>rps1902d ::kanR cnt2 -ade6 ::nat leu1-32 ura4-D18 ade6D ::hph</i> | Lab stock  |
| ZJ-S2201D | <i>rps2201d ::kanR leu1-32 ura4-D18 ade6 ?</i>                       | This study |
| B31-F02   | <i>rps2202d ::kanR cnt2 -ade6 ::nat leu1-32 ura4-D18 ade6D ::hph</i> | Lab stock  |
| B28-B01   | <i>rps23d ::kanR cnt2 -ade6 ::nat leu1-32 ura4-D18 ade6D ::hph</i>   | Lab stock  |
| B11-G04   | <i>rps2302d ::kanR cnt2 -ade6 ::nat leu1-32 ura4-D18 ade6D ::hph</i> | Lab stock  |
| B09-A08   | <i>rps2401d ::kanR cnt2 -ade6 ::nat leu1-32 ura4-D18 ade6D ::hph</i> | Lab stock  |
| B01-C11   | <i>rps2801d ::kanR cnt2 -ade6 ::nat leu1-32 ura4-D18 ade6D ::hph</i> | Lab stock  |
| B29-H08   | <i>rps2802d ::kanR cnt2 -ade6 ::nat leu1-32 ura4-D18 ade6D ::hph</i> | Lab stock  |
| B05-G05   | <i>rps3001d ::kanR cnt2 -ade6 ::nat leu1-32 ura4-D18 ade6D ::hph</i> | Lab stock  |
| ZJ-S3002D | <i>rps3002d ::kanR leu1-32 ura4-D18 ade6 ?</i>                       | This study |
| B06-F05   | <i>rpl501d ::kanR cnt2 -ade6 ::nat leu1-32 ura4-D18 ade6D ::hph</i>  | Lab stock  |
| B21-B12   | <i>rpl502d ::kanR cnt2 -ade6 ::nat leu1-32 ura4-D18 ade6D ::hph</i>  | Lab stock  |
| B30-C03   | <i>rpl803d ::kanR cnt2 -ade6 ::nat leu1-32 ura4-D18 ade6D ::hph</i>  | Lab stock  |
| B26-E03   | <i>rpl901d ::kanR cnt2 -ade6 ::nat leu1-32 ura4-D18 ade6D ::hph</i>  | Lab stock  |
| B17-D11   | <i>rpl902d ::kanR cnt2 -ade6 ::nat leu1-32 ura4-D18 ade6D ::hph</i>  | Lab stock  |
| B27-A08   | <i>rpl1002d ::kanR cnt2 -ade6 ::nat leu1-32 ura4-D18 ade6D ::hph</i> | Lab stock  |
| B22-F07   | <i>rpl1101d ::kanR cnt2 -ade6 ::nat leu1-32 ura4-D18 ade6D ::hph</i> | Lab stock  |
| B32-B02   | <i>rpl1102d ::kanR cnt2 -ade6 ::nat leu1-32 ura4-D18 ade6D ::hph</i> | Lab stock  |
| B39-C06   | <i>rpl1201d ::kanR cnt2 -ade6 ::nat leu1-32 ura4-D18 ade6D ::hph</i> | Lab stock  |
| B20-B01   | <i>rpl1202d ::kanR cnt2 -ade6 ::nat leu1-32 ura4-D18 ade6D ::hph</i> | Lab stock  |
| B18-H10   | <i>rpl15d ::kanR cnt2 -ade6 ::nat leu1-32 ura4-D18 ade6D ::hph</i>   | Lab stock  |
| B26-B12   | <i>rpl1502d ::kanR cnt2 -ade6 ::nat leu1-32 ura4-D18 ade6D ::hph</i> | Lab stock  |
| B02-A10   | <i>rpl1603d ::kanR cnt2 -ade6 ::nat leu1-32 ura4-D18 ade6D ::hph</i> | Lab stock  |
| B36-F08   | <i>rpl1701d ::kanR cnt2 -ade6 ::nat leu1-32 ura4-D18 ade6D ::hph</i> | Lab stock  |
| B28-B04   | <i>rpl1702d ::kanR cnt2 -ade6 ::nat leu1-32 ura4-D18 ade6D ::hph</i> | Lab stock  |
| B39-C10   | <i>rpl1901d ::kanR cnt2 -ade6 ::nat leu1-32 ura4-D18 ade6D ::hph</i> | Lab stock  |
| B23-B02   | <i>rpl1902d ::kanR cnt2 -ade6 ::nat leu1-32 ura4-D18 ade6D ::hph</i> | Lab stock  |
| B36-G12   | <i>rpl2001d ::kanR cnt2 -ade6 ::nat leu1-32 ura4-D18 ade6D ::hph</i> | Lab stock  |
| B24-C11   | <i>rpl2002d ::kanR cnt2 -ade6 ::nat leu1-32 ura4-D18 ade6D ::hph</i> | Lab stock  |
| B28-B12   | <i>rpl2101d ::kanR cnt2 -ade6 ::nat leu1-32 ura4-D18 ade6D ::hph</i> | Lab stock  |
| B30-H07   | <i>rpl2102d ::kanR cnt2 -ade6 ::nat leu1-32 ura4-D18 ade6D ::hph</i> | Lab stock  |
| B02-E02   | <i>rpl24d ::kanR cnt2 -ade6 ::nat leu1-32 ura4-D18 ade6D ::hph</i>   | Lab stock  |
| B30-H08   | <i>rpl2402d ::kanR cnt2 -ade6 ::nat leu1-32 ura4-D18 ade6D ::hph</i> | Lab stock  |
| B03-E03   | <i>rpl2702d ::kanR cnt2 -ade6 ::nat leu1-32 ura4-D18 ade6D ::hph</i> | Lab stock  |
| B29-E08   | <i>rpl2801d ::kanR cnt2 -ade6 ::nat leu1-32 ura4-D18 ade6D ::hph</i> | Lab stock  |
| ZJ-L2802D | <i>rpl2802d ::kanR leu1-32 ura4-D18 ade6 ?</i>                       | This study |
| B04-H09   | <i>rpl3002d ::kanR cnt2 -ade6 ::nat leu1-32 ura4-D18 ade6D ::hph</i> | Lab stock  |

|           |                                                                      |            |
|-----------|----------------------------------------------------------------------|------------|
| B03-B10   | <i>rpl3201d ::kanR cnt2 -ade6 ::nat leu1-32 ura4-D18 ade6D ::hph</i> | Lab stock  |
| B27-D12   | <i>rpl3202d ::kanR cnt2 -ade6 ::nat leu1-32 ura4-D18 ade6D ::hph</i> | Lab stock  |
| B21-H11   | <i>rpl3601d ::kanR cnt2 -ade6 ::nat leu1-32 ura4-D18 ade6D ::hph</i> | Lab stock  |
| B38-A02   | <i>rpl3602d ::kanR cnt2 -ade6 ::nat leu1-32 ura4-D18 ade6D ::hph</i> | Lab stock  |
| B08-D11   | <i>rpl3702d ::kanR cnt2 -ade6 ::nat leu1-32 ura4-D18 ade6D ::hph</i> | Lab stock  |
| B01-D06   | <i>rpl3801d ::kanR cnt2 -ade6 ::nat leu1-32 ura4-D18 ade6D ::hph</i> | Lab stock  |
| LW-L3802D | <i>rpl3802d ::kanR leu1-32 ura4-D18 ade6 ?</i>                       | This study |
| B08-A07   | <i>rpl4301d ::kanR cnt2 -ade6 ::nat leu1-32 ura4-D18 ade6D ::hph</i> | Lab stock  |
| B30-C10   | <i>rpl4302d ::kanR cnt2 -ade6 ::nat leu1-32 ura4-D18 ade6D ::hph</i> | Lab stock  |
